# Supplementary material for: The evolution of pandemic influenza: evidence from India, 1918–19
Source: PubMed Central journal article supplement (PMC4262128; doi:10.1186/1471-2334-14-510), 2014-09-19
Supplement: 12879_2014_3837_MOESM5_ESM.pdf [file 12879_2014_3837_MOESM5_ESM.pdf]

|                  |                                    | SEVERITY OF WAVE          |                                    | LENGTH OF WAVE           |                          | TIMING OF WAVE           |                          | SHAPE OF WAVE       |               |
|------------------|------------------------------------|---------------------------|------------------------------------|--------------------------|--------------------------|--------------------------|--------------------------|---------------------|---------------|
|                  |                                    | Peak Excess Mortality     | Standardized Peak Excess Mortality | Mean Time to Mortality   | Duration of Wave         | Peak Date of Wave        | Midpoint of Wave         | Variance of Wave    | Wave Symmetry |
| SEVERITY OF WAVE | Peak Excess Mortality              | 1.00                      |                                    |                          |                          |                          |                          |                     |               |
|                  | Standardized Peak Excess Mortality | 0.61<br><i>&lt;.0001</i>  | 1.00                               |                          |                          |                          |                          |                     |               |
| LENGTH OF WAVE   | Mean Time to Mortality             | -0.37<br><i>&lt;.0001</i> | -0.39<br><i>&lt;.0001</i>          | 1.00                     |                          |                          |                          |                     |               |
|                  | Duration of Wave                   | -0.33<br><i>&lt;.0001</i> | -0.36<br><i>&lt;.0001</i>          | 0.94<br><i>&lt;.0001</i> | 1.00                     |                          |                          |                     |               |
| TIMING OF WAVE   | Peak Date of Wave                  | -0.24<br><i>0.00</i>      | -0.38<br><i>&lt;.0001</i>          | 0.36<br><i>&lt;.0001</i> | 0.31<br><i>&lt;.0001</i> | 1.00                     |                          |                     |               |
|                  | Midpoint of Wave                   | -0.27<br><i>&lt;.0001</i> | -0.39<br><i>&lt;.0001</i>          | 0.68<br><i>&lt;.0001</i> | 0.78<br><i>&lt;.0001</i> | 0.70<br><i>&lt;.0001</i> | 1.00                     |                     |               |
| SHAPE OF WAVE    | Variance of Wave                   | -0.22<br><i>0.00</i>      | -0.25<br><i>0.00</i>               | 0.85<br><i>&lt;.0001</i> | 0.88<br><i>&lt;.0001</i> | 0.14<br><i>0.05</i>      | 0.69<br><i>&lt;.0001</i> | 1.00                |               |
|                  | Wave Symmetry                      | -0.03<br><i>0.67</i>      | -0.13<br><i>0.06</i>               | 0.09<br><i>0.20</i>      | 0.37<br><i>&lt;.0001</i> | 0.05<br><i>0.44</i>      | 0.44<br><i>&lt;.0001</i> | 0.17<br><i>0.01</i> | 1.00          |

\*Epidemic Definition: Mortality is 1 $\sigma$  above Baseline.

\*Pearson Correlation Coefficients, N = 213.

\**p*-values for null hypothesis of 0 correlation in italics. Shaded correlations are significant at the 1% level.
