# Supplementary material for: The evolution of pandemic influenza: evidence from India, 1918–19
Source: PubMed Central journal article supplement (PMC4262128; doi:10.1186/1471-2334-14-510), 2014-09-19

### Bombay

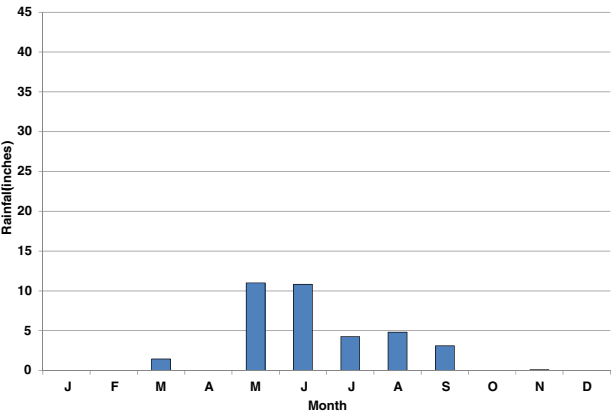

### Calcutta

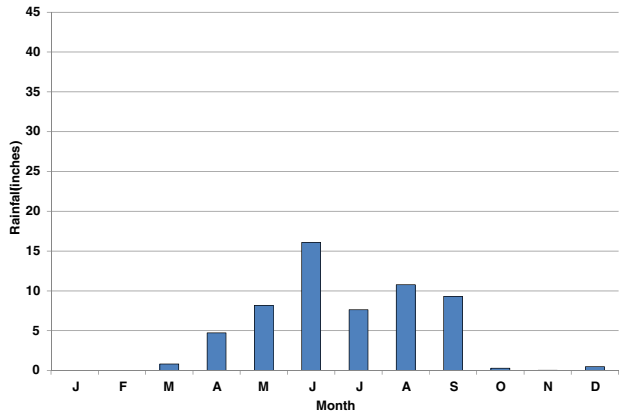

### Madras

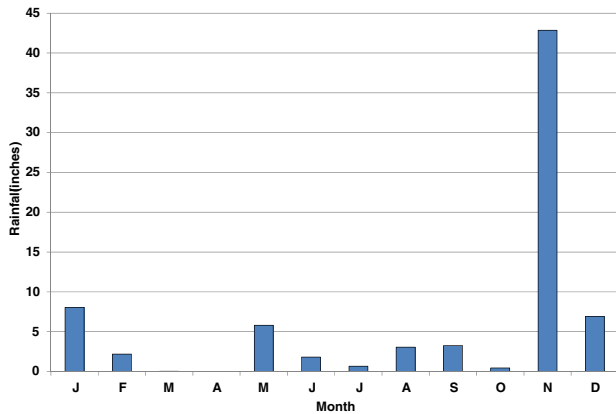

Supplement: 12879_2014_3837_MOESM7_ESM.pdf [file 12879_2014_3837_MOESM7_ESM.pdf]
